# Supplementary material for: Ecological Momentary Assessments and Passive Sensing in the Prediction of Short-Term Suicidal Ideation in Young Adults
Source: PubMed Central journal article supplement (PMC10410485; doi:10.1001/jamanetworkopen.2023.28005), 2023-08-08
Supplement: jamanetwopen-e2328005-s001.pdf [file jamanetwopen-e2328005-s001.pdf]

## Supplemental Online Content

Czyz EK, King CA, Al-Dajani N, Zimmermann L, Hong V, Nahum-Shani I. Ecological momentary assessments and passive sensing in the prediction of short-term suicidal ideation in young adults. *JAMA Netw Open*. 2023;6(8):e2328005. doi:10.1001/jamanetworkopen.2023.28005

**eMethods 1.** Ecological Momentary Assessment Items

**eMethods 2.** Details on Preparing Fitbit Features

**eMethods 3.** Variable Selection Approach Using Penalized GEE

**eMethods 4.** Framework for Prediction Modeling Using GLMM Trees

**eFigure 1.** Suicidal Ideation Time Series Plots for Each Participant

**eFigure 2.** Relative Variable Importance From GLMM Trees Using EMA Data

**eFigure 3.** Relative Variable Importance From GLMM Trees Using EMA and Passive Data

**eFigure 4.** Relative Variable Importance From GLMM Trees Using EMA Data, Without Suicidal Ideation-Related Features

**eTable.** Estimated Odds Ratios, Using Mixed Effects Logistic Regression

**eReferences**

This supplemental material has been provided by the authors to give readers additional information about their work.

## eMethods 1. Ecological momentary assessment items

| Variable (Range)                     | Source            | Prompt                                                                                                                        |
|--------------------------------------|-------------------|-------------------------------------------------------------------------------------------------------------------------------|
| Happy (1-5)                          | EMAs (4x per day) | Please rate how much you felt this way in the last hour: Happy                                                                |
| Miserable (1-5)                      | EMAs (4x per day) | Please rate how much you felt this way in the last hour: Miserable                                                            |
| Angry (1-5)                          | EMAs (4x per day) | Please rate how much you felt this way in the last hour: Angry                                                                |
| Nervous (1-5)                        | EMAs (4x per day) | Please rate how much you felt this way in the last hour: Nervous                                                              |
| Sad (1-5)                            | EMAs (4x per day) | Please rate how much you felt this way in the last hour: Sad                                                                  |
| Rumination (1-7)                     | EMAs (4x per day) | Please rate how much these fit your experience in the last hour:<br>I was dwelling on my feelings and problems                |
| Worry (1-7)                          | EMAs (4x per day) | Please rate how much these fit your experience in the last hour:<br>I was worried about things that could happen              |
| Agitation (1-7)                      | EMAs (4x per day) | Please rate how much these fit your experience in the last hour:<br>I felt so stirred up inside that I wanted to scream       |
| Hopelessness (1-4)                   | EMAs (4x per day) | Please rate how much you felt this way in the last hour: I see only bad things ahead of me, not good things                   |
| Buren (1-7)                          | EMAs (4x per day) | Please rate how much these fit your experience in the last hour: I felt people in my life would be happier without me         |
| Close to others (1-7)                | EMAs (4x per day) | Please rate how much these fit your experience in the last hour: I felt close to my family                                    |
| Self-efficacy (0-10)                 | EMAs (4x per day) | How confident are you that you will be able to keep yourself from attempting suicide?                                         |
| Duration of death thoughts (0-4)     | EMAs (4x per day) | In the last hour, did you wish you were dead or that you could go to sleep and not wake up? How long did these thoughts last? |
| Duration of suicidal ideation (0-4)  | EMAs (4x per day) | In the last hour, did you have thoughts of killing yourself? How long did these thoughts last?                                |
| Intensity of suicidal ideation (0-5) | EMAs (4x per day) | In the last hour, how strong was your intention to kill yourself?                                                             |

| <b>Variable (Range)</b>                     | <b>Source</b>      | <b>Prompt</b>                                                                                                                                                                                                                                      |
|---------------------------------------------|--------------------|----------------------------------------------------------------------------------------------------------------------------------------------------------------------------------------------------------------------------------------------------|
| Frequency of death thoughts (0-4)           | Evening EMA survey | Today, how many times did you wish you were dead or that you could go to sleep and not wake up?                                                                                                                                                    |
| Frequency of suicidal ideation (0-4)        | Evening EMA survey | Today, how many times did you have thoughts of killing yourself?                                                                                                                                                                                   |
| Intensity of suicidal ideation (0-5)        | Evening EMA survey | Today, how strong was your intention to kill yourself?                                                                                                                                                                                             |
| Negative relationship events (dichotomized) | Evening EMA survey | Today, did you have a negative relationship event such as a serious or disruptive argument, separation, or falling out with someone? [includes 6 relationship categories: romantic; friend/peer; teacher/boos; parent; non-parent relative; other) |
| Coping (0-6)                                | Evening EMA survey | Today, how much did you do these things to deal or cope with your feelings or any stressful situations? [includes cognitive, non-cognitive, and support-seeking strategies]                                                                        |
| Sleep quality (0-4)                         | Morning EMA survey | How would you rate the quality of your sleep?                                                                                                                                                                                                      |
| Nonsuicidal self-injury (dichotomized)      | Morning EMA survey | Thinking about yesterday how many times did you harm yourself or hurt your body on purpose (such as cutting, burning, biting, hitting self) without the intention to die                                                                           |
| Alcohol (in standard drinks)                | Morning EMA survey | How many standard drinks containing alcohol did you have yesterday?<br>By a standard drink we mean a 12 ounce can or glass of beer or wine cooler; or a 5-ounce glass of wine, or a drink with 1 shot of liquor.                                   |

## eMethods 2. Details on preparing Fitbit features

| Item Name            | Item Values/Description                    | General Description                                                                                                                                                                                                                                                                                                                                                                                                                                                            |
|----------------------|--------------------------------------------|--------------------------------------------------------------------------------------------------------------------------------------------------------------------------------------------------------------------------------------------------------------------------------------------------------------------------------------------------------------------------------------------------------------------------------------------------------------------------------|
| RestingHeartRate     | Integer, observed range:<br>50-105 bpm     | Raw variable from daily Fitabase totals.<br>"Resting heart rate value." [from Fitabase]                                                                                                                                                                                                                                                                                                                                                                                        |
| TotalMinutesAsleep   | Integer, observed range:<br>0-32000 steps  | Raw variable from daily Fitabase totals.<br>"Total number of steps taken." [from Fitabase]                                                                                                                                                                                                                                                                                                                                                                                     |
| Adherence            | Continuous proportion, range:<br>0-1       | Daily proportion of total minutes with a heart rate value (i.e., Value not missing nor zero) divided by 1440 (24 hours * 60 min) minutes in a day.<br>(Input variable: Value from 1 Min HR [from Fitabase])                                                                                                                                                                                                                                                                    |
| Num_adherence        | Continuous, range:<br>0-1440 minutes       | Daily number of minutes with a heart rate value (i.e., Value not missing nor zero). Intended to indicate wear-time.<br>(Input variable: Value from 1 Min HR [from Fitabase])                                                                                                                                                                                                                                                                                                   |
| Denom_adherence      | Fixed: 1440 minutes                        | 1440 (24 hours * 60 min) minutes in a day                                                                                                                                                                                                                                                                                                                                                                                                                                      |
| TotalSteps_corrected | Discrete, observed range:<br>0-32000 steps | Daily number of steps where values with TotalSteps equal to zero and Adherence equal to zero are set to be a missing value.<br>(Input variables: TotalSteps [from Fitabase] and Adherence [computed, as detailed above])                                                                                                                                                                                                                                                       |
| RMSSD_mean           | Continuous, observed range:<br>0-169.51 ms | Daily average of root mean squared value of the successive differences of R-R intervals, approximated using 1 minute pulse rates. The average of the successive differences is computed over 5-minute intervals and subsequently averaged over the 24-hour day.<br>(Input variables: RR interval [calculation, as detailed below])                                                                                                                                             |
| RR interval          | Continuous, observed range:<br>250-1700 ms | The R-R interval is defined as the time in milliseconds between consecutive heart beats. In other words, the R-R interval is estimated by the inverse of the pulse rate. We convert the heart rate (in beats per minute) to the R-R interval (in milliseconds) as follows:<br>$RR = \frac{1 \text{ min}}{HR \text{ beats}} \times \frac{60 \text{ sec}}{1 \text{ min}} \times \frac{1000 \text{ ms}}{1 \text{ sec}}$<br>(Input variables: Value from 1 Min HR [from Fitabase]) |

### **eMethods 3.** Variable selection approach using penalized GEE

The present study performed variable selection to identify features correlated with the outcome of next-day suicidal ideation, using penalized generalized estimating equations (PGEE) developed by Wang and colleagues.<sup>1</sup> We opted to use PGEE regularization, as the present study concerned intensive longitudinal data with a large number of features,<sup>1</sup> and as this approach was previously used in mobile health research utilizing repeated measurements.<sup>2</sup> The PGEE package in R was used,<sup>3</sup> and code files are available via [github.com/lzimmermann4/Short-term\\_SI](https://github.com/lzimmermann4/Short-term_SI).

Below, we describe the parameters used in the estimation algorithm for the tuning parameter. First, the cross-validated value of the tuning parameter ( $\lambda$ ) with a grid search was obtained. That is, Wang and colleagues' penalized GEE<sup>1</sup> incorporates a SCAD penalty, which involves parameters  $\lambda$  and  $a$ . In the PGEE R package, Inan and Wang<sup>3</sup> specify  $a = 3.7$  as recommended.<sup>4</sup> Further details on properties and functional form of the SCAD penalty are detailed in Fan and Li.<sup>4</sup> For deriving the optimal  $\lambda$ , namely the value that minimizes the cross-validated prediction error, 5-fold cross-validation was employed over a grid with an epsilon threshold of  $10^{-6}$ , maximum iterations of 30, and tolerance of  $10^{-3}$ , as conventionally specified.<sup>3</sup> This was followed by employing PGEE with a first order autoregressive correlation structure, binomial family for the outcome, and the optimal  $\lambda$ . Wang and colleagues<sup>1</sup> demonstrated the robustness of PGEE to misspecification of the correlation structure.

#### **eMethods 4.** Framework for prediction modeling using GLMM trees

We applied multi-level classification and regression tree (CART) models to predict next-day suicidal ideation. Designed to accommodate multi-level and longitudinal data structures, these CART models employ the generalized linear mixed model (GLMM) tree method developed by Fokkema and colleagues.<sup>5,6</sup> We used the *glmertree* R package<sup>6</sup> to apply this method. In this approach, an algorithm akin to expectation maximization is used to iteratively estimate the random effects from a GLMM, wherein we specified a random intercept model, and estimate the fixed effects from the tree, assuming that the random effects are known. This procedure is common to longitudinal tree-based methods that incorporate mixed effects.<sup>7-9</sup>

We used a variance-based method for computing the variable importance (VI) scores for included predictors,<sup>10</sup> developed by Greenwell and colleagues.<sup>10</sup> The *vip* package in R was used to obtain VI scores.<sup>11</sup> The variable importance was averaged across 5 folds in the k-fold cross-validation and 10 repetitions.

**eFigure 1.** Suicidal ideation time series plots for each participant

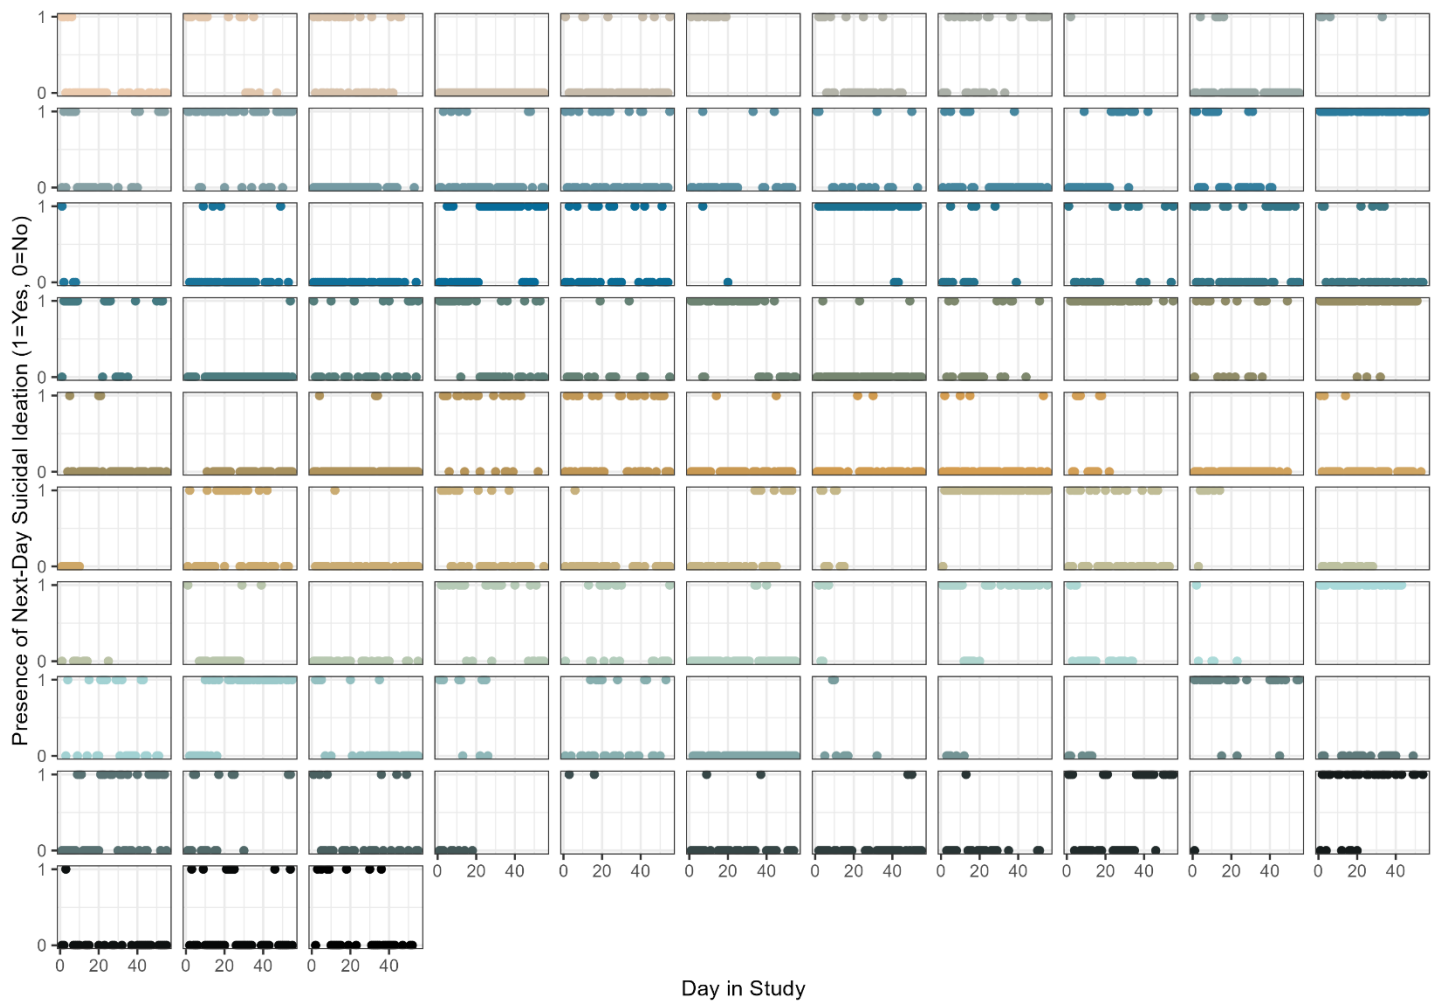

**eFigure 1.** Presence of Next-Day Suicidal Ideation (SI) for each participant, across the 8-week study period (N=102 participants). Note that eligible study participants were young adults recruited from the emergency department, with a last-month suicide attempt and/or last-week suicidal ideation, and who met exclusion criteria.

**eFigure 2.** Relative variable importance from GLMM trees using EMA data

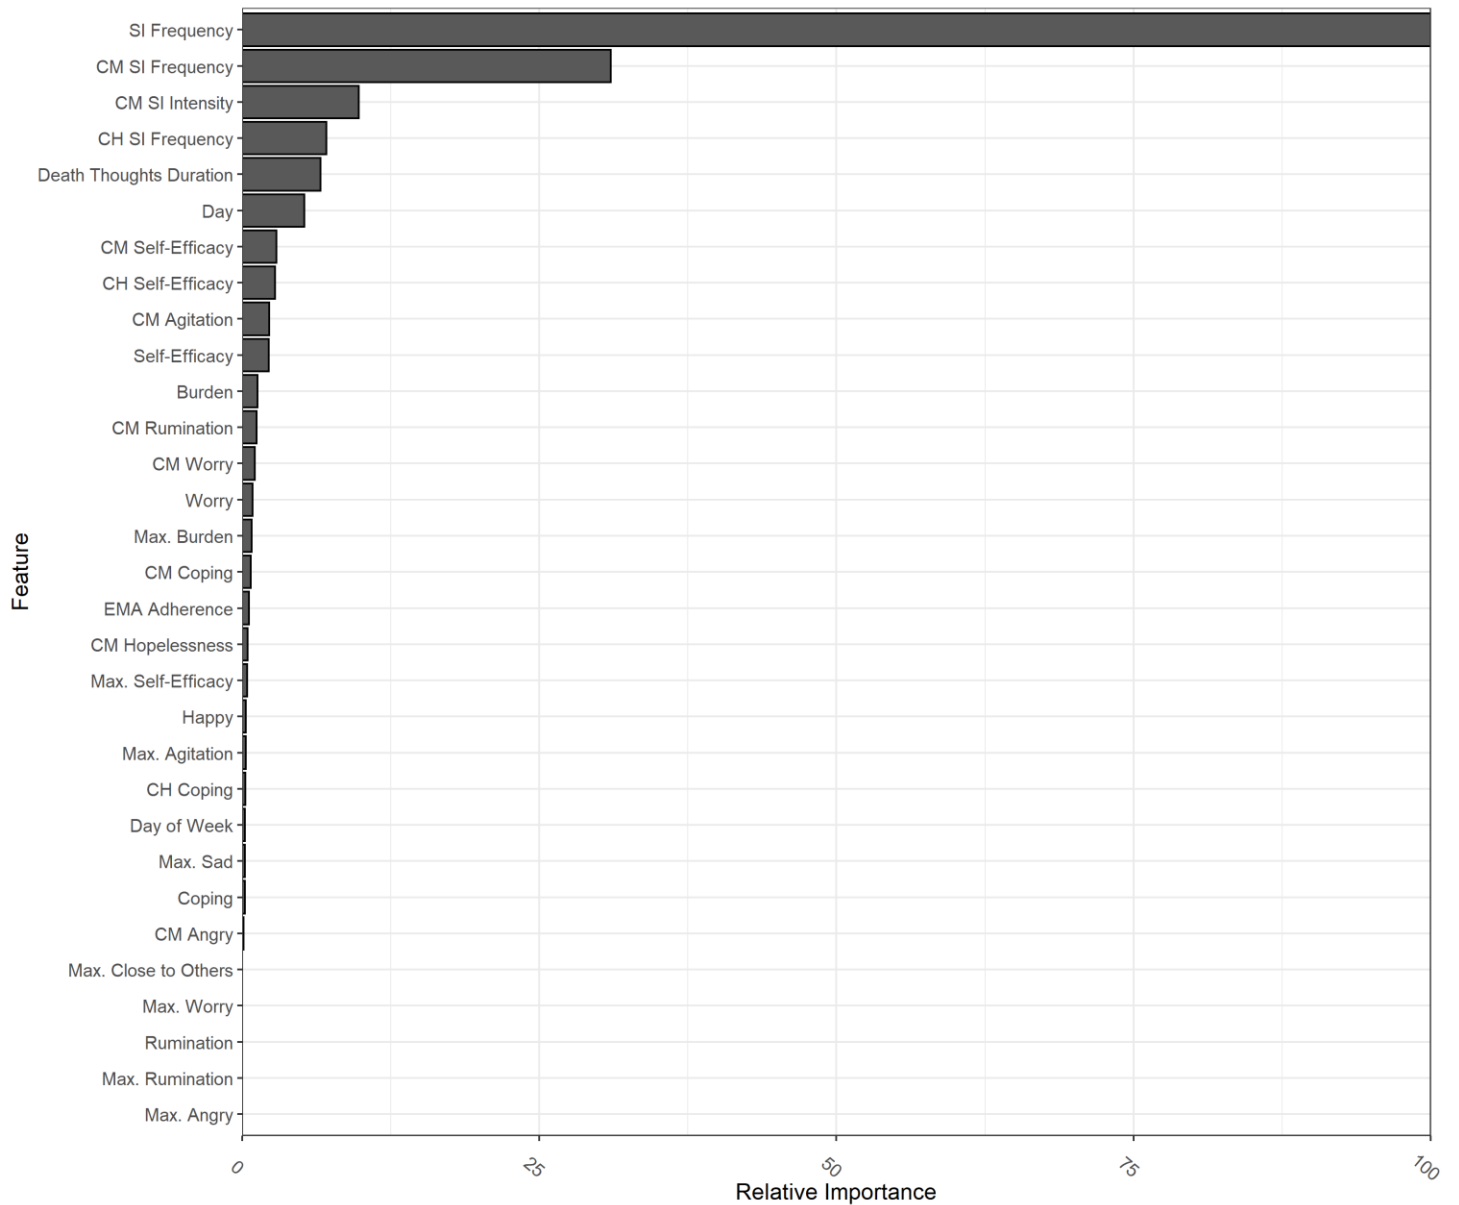

**eFigure 2.** Variable importance from EMA model predicting Next-Day Suicidal Ideation (SI), using GLMM trees, averaged across 5-fold CV and 10 repetitions (N=3,126). Note that CM=cumulative mean, CH=change from cumulative mean, Max.= maximum score from within-day EMAs.



**eFigure 3.** Relative variable importance from GLMM trees using EMA and passive data

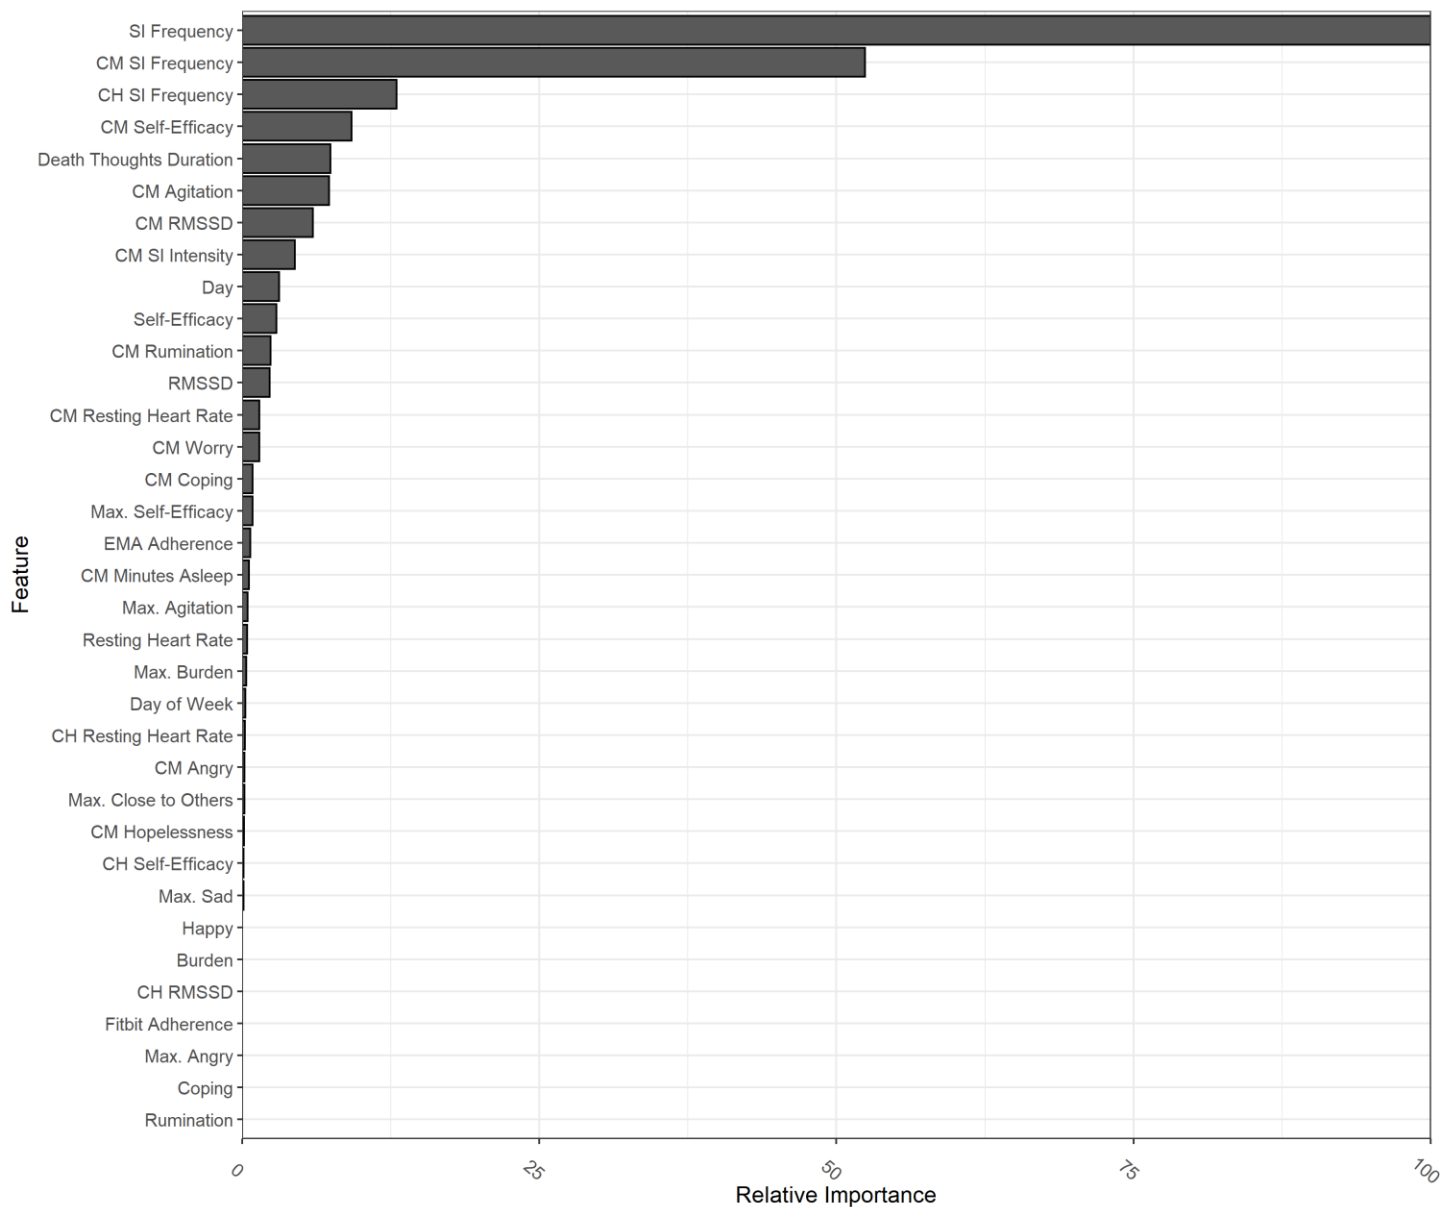

**eFigure 3.** Variable importance from EMA and passive model predicting Next-Day Suicidal Ideation (SI), using GLMM trees, averaged across 5-fold CV and 10 repetitions (N=1,804). Note that CM=cumulative mean, CH=change from cumulative mean, Max.=maximum over 4 within-day EMAs.

**eFigure 4.** Relative variable importance from GLMM trees using EMA data, without suicidal ideation-related features

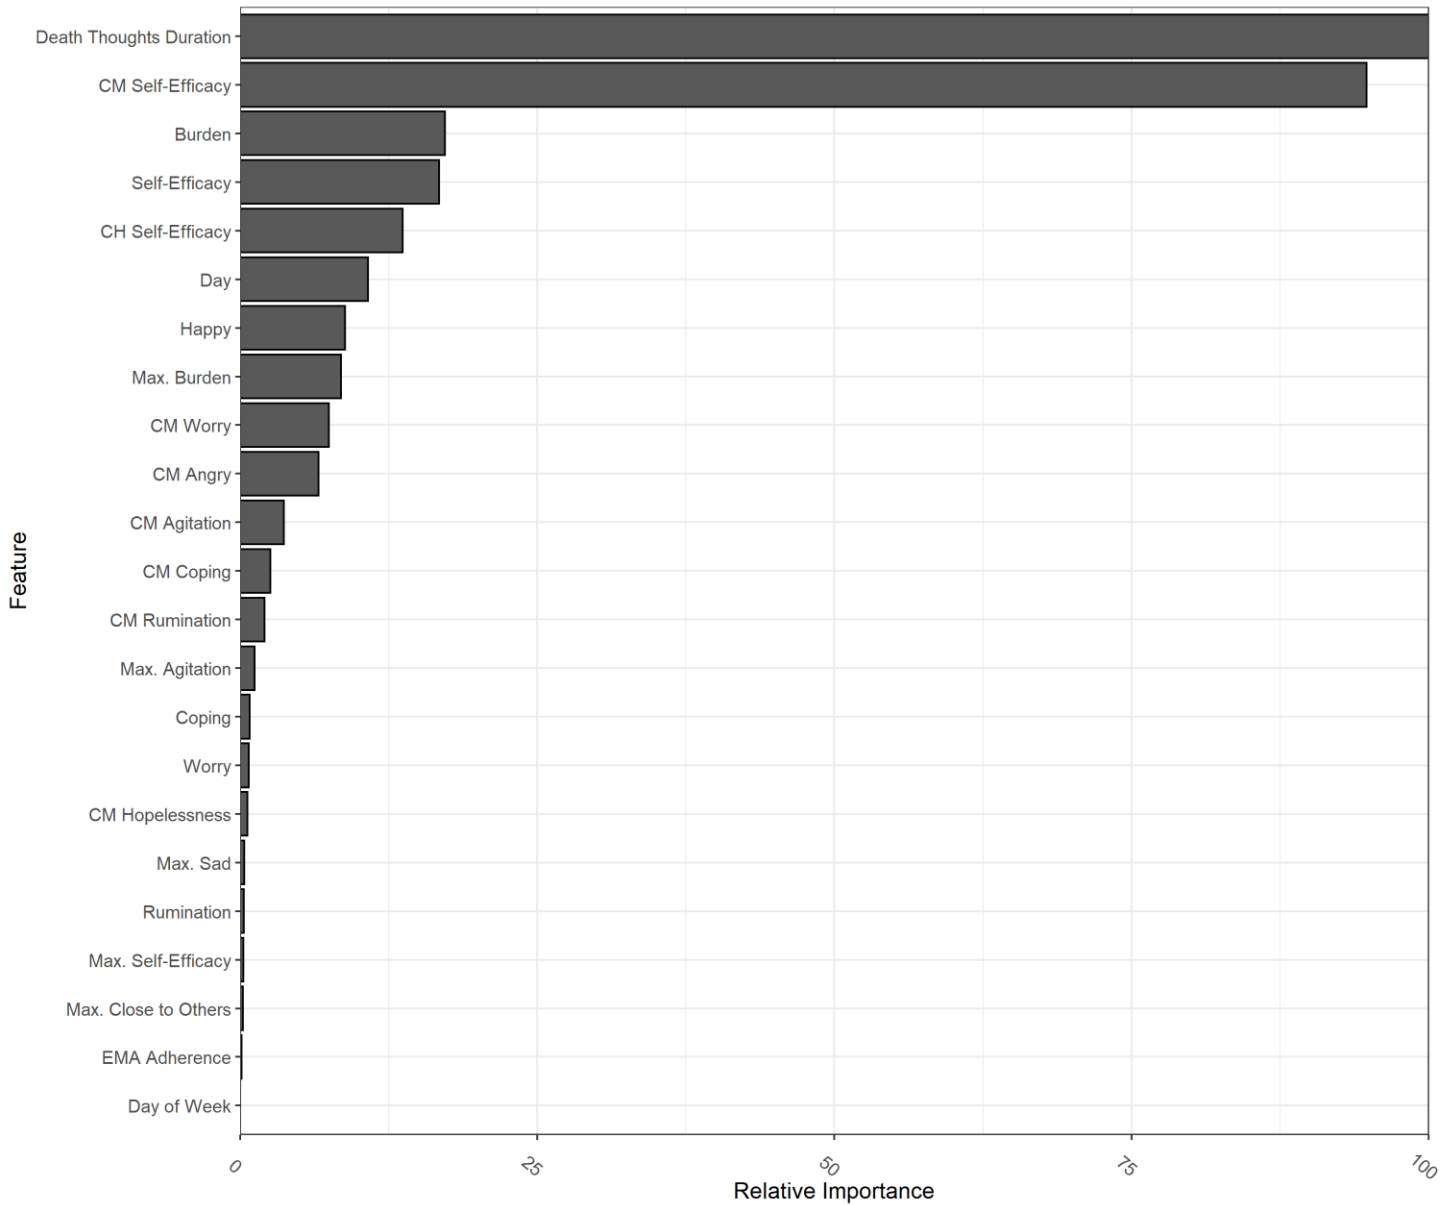

**eFigure 4.** Variable importance from EMA model predicting Next-Day Suicidal Ideation (SI), without suicidal ideation-related features, using GLMM trees, averaged across 5-fold CV and 10 repetitions (N=3,126). Note that CM=cumulative mean, CH=change from cumulative mean, Max.= maximum score from within-day EMAs.

**eTable.** Estimated odds ratios (ORs), using mixed effects logistic regressions

| Source                  | Covariate             | OR (95% Confidence Interval) | N Obs. |
|-------------------------|-----------------------|------------------------------|--------|
| EMAs<br>(4x per day)    | Happy                 | 0.664 (0.573, 0.768)         | 3,126  |
|                         | CM Angry              | 2.267 (1.415, 3.633)         | 3,126  |
|                         | Max. Angry            | 1.316 (1.192, 1.454)         | 3,126  |
|                         | Max. Sad              | 1.363 (1.244, 1.494)         | 3,126  |
|                         | Rumination            | 1.314 (1.213, 1.424)         | 3,126  |
|                         | CM Rumination         | 1.149 (0.964, 1.371)         | 3,126  |
|                         | Max. Rumination       | 1.202 (1.129, 1.279)         | 3,126  |
|                         | Worry                 | 1.305 (1.203, 1.416)         | 3,126  |
|                         | CM Worry              | 1.343 (1.124, 1.603)         | 3,126  |
|                         | Max. Worry            | 1.203 (1.129, 1.282)         | 3,126  |
|                         | CM Agitation          | 1.149 (0.934, 1.415)         | 3,126  |
|                         | Max. Agitation        | 1.183 (1.115, 1.255)         | 3,126  |
|                         | CM Hopelessness       | 2.591 (1.662, 4.037)         | 3,126  |
|                         | Burden                | 1.696 (1.528, 1.883)         | 3,126  |
|                         | Max. Burden           | 1.437 (1.334, 1.549)         | 3,126  |
|                         | Max. Close to Others  | 0.849 (0.787, 0.916)         | 3,126  |
|                         | Self-Efficacy         | 0.693 (0.637, 0.754)         | 3,126  |
|                         | CM Self-Efficacy      | 0.611 (0.521, 0.717)         | 3,126  |
|                         | CH Self-Efficacy      | 0.686 (0.618, 0.761)         | 3,126  |
|                         | Max. Self-Efficacy    | 0.755 (0.688, 0.828)         | 3,126  |
| Death Thoughts Duration | 4.172 (3.318, 5.246)  | 3,126                        |        |
| Evening EMA<br>Survey   | CM SI Intensity       | 17.149 (10.456, 28.127)      | 3,126  |
|                         | SI Frequency          | 3.329 (2.858, 3.878)         | 3,126  |
|                         | CM SI Frequency       | 9.654 (6.968, 13.375)        | 3,126  |
|                         | CH SI Frequency       | 2.985 (2.545, 3.502)         | 3,126  |
|                         | Coping                | 0.997 (0.925, 1.074)         | 3,126  |
|                         | CM Coping             | 0.914 (0.753, 1.109)         | 3,126  |
|                         | CH Coping             | 1.103 (0.931, 1.102)         | 3,126  |
| Fitbit<br>(Daily)       | Resting Heart Rate    | 1.009 (0.977, 1.042)         | 2,177  |
|                         | CM Resting Heart Rate | 1.021 (0.978, 1.065)         | 2,177  |
|                         | CH Resting Heart Rate | 0.995 (0.948, 1.043)         | 2,177  |
|                         | RMSSD                 | 0.995 (0.970, 1.020)         | 2,177  |
|                         | CM RMSSD              | 0.945 (0.900, 0.992)         | 2,177  |
|                         | CH RMSSD              | 1.015 (0.985, 1.046)         | 2,177  |
|                         | CM Minutes Asleep     | 0.999 (0.996, 1.002)         | 2,177  |

Notes: EMA=ecological momentary assessment, CM=cumulative mean, CH=change from cumulative mean, Max.=maximum score from within-day EMAs, SI=suicidal ideation, RMSSD=root mean square of successive difference from heart rate. Coping reflects the sum of three coping types reframe, talk, and distract. Results reflect specification of a random intercept and adjusting for day in study (1-56), day of week (1-7) and missingness indicator. Covariates are mean-centered.

## eReferences

1. Wang L, Zhou J, Qu A. Penalized generalized estimating equations for high-dimensional longitudinal data analysis. *Biometrics*. 2012;68(2):353-360.
2. Inan G, Wang L. PGEE: An R package for analysis of longitudinal data with high-dimensional covariates. *R J*. 2017;9(1):393.
3. Fan J, Li R. Variable selection via nonconcave penalized likelihood and its oracle properties. *J Am Stat Assoc*. 2001;96(456):1348-1360.
4. Sauerbrei W. The use of resampling methods to simplify regression models in medical statistics. *J R Stat Soc Ser C Appl Stat*. 1999;48(3):313-329.
5. Fokkema M, Edbrooke-Childs J, Wolpert M. Generalized linear mixed-model (GLMM) trees: A flexible decision-tree method for multilevel and longitudinal data. *Psychother Res*. 2020:1-13.
6. Fokkema M, Smits N, Zeileis A, Hothorn T, Kelderman H. Detecting treatment-subgroup interactions in clustered data with generalized linear mixed-effects model trees. *Behav Res Methods*. 2018;50:2016-2034.
7. Hajjem A, Larocque D, Bellavance F. Generalized mixed effects regression trees. *Stat Probab Lett*. 2017;126:114-118.
8. Sela RJ, Simonoff JS. RE-EM trees: A data mining approach for longitudinal and clustered data. *Mach Learning*. 2012;86:169-207.
9. Ngufor C, Van Houten H, Caffo BS, Shah ND, McCoy RG. Mixed effect machine learning: A framework for predicting longitudinal change in hemoglobin A1c. *J Biomed Inform*. 2019;89:56-67.
10. Greenwell BM, Boehmke BC, McCarthy AJ. A simple and effective model-based variable importance measure. *arXiv preprint arXiv:1805.04755*. 2018.
11. Greenwell B, Boehmke B, Gray B. Package 'vip'. *Variable Importance Plots*. 2020;12(1):343-366.
