# Supplementary material for: Ecological Momentary Assessments and Passive Sensing in the Prediction of Short-Term Suicidal Ideation in Young Adults
Source: PubMed Central journal article supplement (PMC10410485; doi:10.1001/jamanetworkopen.2023.28005), 2023-08-08
Supplement: jamanetwopen-e2328005-s002.pdf [file jamanetwopen-e2328005-s002.pdf]

## Data Sharing Statement

Czyz. Ecological Momentary Assessments and Passive Sensing in the Prediction of Short-Term Suicidal Ideation in Young Adults. *JAMA Netw Open*. Published August 08, 2023. doi:10.1001/jamanetworkopen.2023.28005

### Data

**Data available:** Yes

**Data types:** Deidentified participant data

**How to access data:** The data that support the findings of this study are available from the corresponding author upon reasonable request.

**When available:** With publication

### Supporting Documents

**Document types:** Statistical/analytic code

**How to access documents:** Analytic code will be available via github repository listed in the manuscript.

**When available:** With publication

### Additional Information

**Who can access the data:** Data will be made available for researchers whose proposed use of the data has been approved.

**Types of analyses:** Data will be available for a specified purpose.

**Mechanisms of data availability:** Data will be made available with a signed data access agreement.
